# Supplementary material for: Plitidepsin/Aplidin® resistance is associated with defective cardiolipin remodeling in human cervical cancer cells
Source: Research Square preprint supplement (doi:10.21203/rs.3.rs-8604714/v1), 2026-02-09
Supplement: Supplementary file 1 [file 4047568393fc887430ea2f68.docx]

**Plitidepsin/Aplidin® resistance is associated with defective cardiolipin remodeling in human cervical cancer cells**

Aline Mathey1,#, Aurélie Mialhe1,#, Randa Sgahier1, Jean-Paul Pais de Barros2, Zandile Mlamla2, François Hermetet1, François Ghiringhelli3,4, Virginie Aires1,2, ≠ & Dominique Delmas5,6 ≠,*.

1 - Université Bourgogne Europe, INSERM, CTM UMR 1231, TIRECS team (Bioactive Molecules and Health Research Group), 21000 Dijon, France;

2 - Université Bourgogne Europe, Centre de Lutte Contre le Cancer G.-F. Leclerc, Institut Agro, CHU Dijon Bourgogne, INSERM, BioSanD US 58 (DiviOmics Platform), 21000 Dijon, France

3 - Université Bourgogne Europe, Centre de Lutte Contre le Cancer G.-F. Leclerc, INSERM, CTM UMR 1231, TIRECS Team, 21000 Dijon, France

4 -Université Bourgogne Europe, Centre de Lutte Contre le Cancer G.-F. Leclerc, Institut Agro, CHU Dijon Bourgogne, INSERM, BioSanD US 58 (PTBC Platform), 21000 Dijon, France

5 - Université Bourgogne Europe, Centre de Lutte Contre le Cancer G.-F. Leclerc, INSERM, CTM UMR 1231, TIRECS Team (Bioactive Molecules and Health Research Group), 21000 Dijon, France

6 -Université Bourgogne Europe, Centre de Lutte Contre le Cancer G.-F. Leclerc, Institut Agro, CHU Dijon Bourgogne, INSERM, BioSanD US 58, 21000 Dijon, France

# These authors contributed equally of this work

≠ Senior author coshared this work

***To whom all correspondence should be addressed:**

Pr. Dominique Delmas

Centre de Recherche Inserm U1231 "Center for Translational and Molecular Medicine"

Faculté des Sciences de Santé

7, Bd Jeanne d’Arc, 21000 Dijon, France

Phone number: +33-380-39-32-26

Email: [dominique.delmas@u-bourgogne.fr](mailto:dominique.delmas@u-bourgogne.fr)

**Supplementary figures S1-S7**

**Supplementary Figure S1. Differential sensitivity of HeLa WT and APLR cells to Aplidin® (APL). A)** Growth inhibition of HeLa WT and APLR cells after 48 and 72h of exposure to increasing APL concentrations (0-10 000 nM). Results are expressed as mean percentage of control growth ± s.d. of three independent experiments (with *n*≥3). **B)** Densitometric quantification of western blot obtained in **Figure 1E)**. **C)** After treatment of HeLa WT and APLR cells with vehicle (Co) or 450 nM APL for 3. 6. 18 and 24h. protein expressions of pro and cleaved forms of Caspase 3 and PARP were analyzed by immunoblotting. HSC-70 was used as the loading control. **D)** Heatmap representing densitometric quantification of western blot obtained in **C)**. Data are expressed as mean fold induction of three independent experiments in **B)** and **D)**. Significance was determined by a two-way ANOVA followed by Tukey’s multiple comparison test in **B)** and a one-way ANOVA followed by Tukey’s multiple comparison test in **D)**. ns. not significant; **p*<0.05; ***p*<0.01; ****p*<0.001 and *****p*<0.0001.

**Supplementary Figure S2. Quantification of the protein expressions of the key players of apoptosis in HeLa WT and APLR cells after a 24h Aplidin® (APL) treatment. A–B)** Densitometric quantification of western blot shown in **Figure 1I)**. Panel A reports the expression levels of Bid, tBid, Bax and Bak. Panel B shows the corresponding ratios Bax/Bcl-2, Bax/Bcl-xL, Bak/Bcl-2, and Bak/Bcl-xL. **C)** Densitometric quantification of the western blot shown in **Figure 1J)**, following cytosolic and mitochondrial fractionation. Data are expressed as mean fold induction of three independent experiments. Significance was determined by a two-way ANOVA followed by Tukey’s multiple comparison test. ns. not significant; **p*<0.05; ***p*<0.01 and ****p*<0.001.

**Supplementary Figure S3. Extended profiling of CL remodeling intermediates (MLCL. DLCL) and derived ratios in WT and APLR cells in response to APL. A)** Violin plots showing total tetra-acylated CL. total MLCL and DLCL content. DLCL to tetra-acylated CL ratio and total DLCL and MLCL to total pool of CL ratio in HeLa WT and APLR cells after 24 h of treatment with vehicle (Co) or 450 nM Aplidin (APL). Values correspond to log₂-transformed lipid quantities (pmol/mg of proteins) determined by HPLC–MS/MS. **B)** Volcano plots showing differential abundance of individual cardiolipin (CL) species between Aplidin-treated and control APLR cells. Log₂(fold change) is plotted against –log₁₀(adjusted p-value). with significantly increased and decreased species highlighted in red and blue. respectively. and non-significant species shown in grey. Data are from three independent experiments with n=3. Significance was determined by a two-way ANOVA followed by Tukey’s multiple comparison test in **A).** and a two-tailed Student’s t-test followed by Benjamini–Hochberg FDR correction in **B).** ns. not significant; **p*<0.05; ***p*<0.01 and *****p*<0.0001.

**Supplementary Figure S4. Phospholipid (PL) remodeling and cardiolipin (CL)-associated changes in HeLa WT and APLR cells upon Aplidin treatment.** Total lipids were extracted from HeLa WT and APLR cells after 24h of treatment with vehicle (Co) or 450 nM APL and CL, PL and plasmalogens (*i.e.* pPC, pPE) were quantified by HPLC-MS/MS. **A)** Violin plots showing total PC, PE, pPC and pPE to total CL ratio in HeLa WT and APLR cells after 24 h of treatment with vehicle (Co) or 450 nM Aplidin (APL). Values correspond to log₂-transformed lipid quantities (pmol/mg of proteins) from three independent experiments with *n*=3. **B)** Volcano plots showing differential abundance of individual PL (*i.e.* PC, LPC, PE, LPE) and plasmalogens (*i.e.* pPC, pPE) species between APLR and WT cells, Aplidin-treated vs control WT cells and Aplidin-treated vs control APLR cells. Log₂(fold change) is plotted against –log₁₀(adjusted p-value), with significantly increased and decreased species highlighted in red and blue, respectively, and non-significant species shown in grey. Data are from three independent experiments with *n*=3. Significance was determined by a two-way ANOVA followed by Tukey’s multiple comparison test in **A)** anda two-tailed Student’s t-test followed by Benjamini–Hochberg FDR correction in **B)**. ns. not significant; **p*<0.05; ***p*<0.01; ****p*<0.001 and *****p*<0.0001. **C)** Correlation between cardiolipin (CL) species and major phospholipid (PL) classes.Heatmap showing the correlation coefficients (r) between significantly modulated CL species and phospholipid classes (PC, pPE, pPC, LPC, PE, LPE). Each cell represents the Pearson correlation value between a given CL species (rows) and a PL class (columns), as indicated by the color scale (red: positive correlation; blue: negative correlation). Hierarchical clustering of both CL species and PL classes highlights distinct correlation patterns suggesting coordinated remodeling of mitochondrial and membrane phospholipids.

**Supplementary Figure S5. Analysis of mitophagic flux and autophagy markers in HeLa WT and APLR cells. A)** Flow cytometry analysis of the pH-dependent spectral shift of mt-mKeima Red Parkin2.After 24h. mt-mKeima Red Parkin2 plasmid-transfected HeLa WT and APLR cells were treated with vehicle. 10 µM FCCP or 450 nM APL with or without co-treatment with 100 nM Bafilomycin A1 (BafA1) for 3h. 6h and 24h. Mitophagic flux was assessed by flow cytometry. Values shown in the upper gate indicate the percentage of cells with high levels of mitophagy. **B)** Quantification of the protein expressions of the key players of autophagy in HeLa WT and APLR cells. Densitometric quantification of western blot obtained in **Figure 5C)**. Data are expressed as mean fold induction of three independent experiments. Significance was determined by a one-way ANOVA followed by Tukey’s multiple comparison test. ns. not significant; **p*<0.05; ***p*<0.01 and ****p*<0.001.

**Supplementary Figure S6.** Densitometric quantification of western blot obtained in **Figure 6E).** Data are expressed as mean fold induction from three independent experiments. Significance was determined by a two-way ANOVA followed by Tukey’s multiple comparison test. ns. not significant; **p*<0.05; ***p*<0.01; and *****p*<0.0001.

**Supplementary Figure S7.** Densitometric quantification of western blot obtained in **Figure 7F).** Data are expressed as mean fold induction from n=10 sample per group. Significance was determined by a two-way ANOVA followed by Tukey’s multiple comparison test. ns. not significant; **p*<0.05; ***p*<0.01; and *****p*<0.0001.
