# Supplementary material for: Plitidepsin/Aplidin® resistance is associated with defective cardiolipin remodeling in human cervical cancer cells
Source: Research Square preprint supplement (doi:10.21203/rs.3.rs-8604714/v1), 2026-02-09
Supplement: Supplementary file 2 [file e8f156e28e1cbd75a95cfb00.docx]

**Plitidepsin/Aplidin® resistance is associated with defective cardiolipin remodeling in human cervical cancer cells**

Aline Mathey1,#, Aurélie Mialhe1,#, Randa Sgahier1, Jean-Paul Pais de Barros2, Zandile Mlamla2, François Hermetet1, François Ghiringhelli3,4, Virginie Aires1,2, ≠ & Dominique Delmas5,6 ≠,*.

1 - Université Bourgogne Europe, INSERM, CTM UMR 1231, TIRECS team (Bioactive Molecules and Health Research Group), 21000 Dijon, France;

2 - Université Bourgogne Europe, Centre de Lutte Contre le Cancer G.-F. Leclerc, Institut Agro, CHU Dijon Bourgogne, INSERM, BioSanD US 58 (DiviOmics Platform), 21000 Dijon, France

3 - Université Bourgogne Europe, Centre de Lutte Contre le Cancer G.-F. Leclerc, INSERM, CTM UMR 1231, TIRECS Team, 21000 Dijon, France

4 -Université Bourgogne Europe, Centre de Lutte Contre le Cancer G.-F. Leclerc, Institut Agro, CHU Dijon Bourgogne, INSERM, BioSanD US 58 (PTBC Platform), 21000 Dijon, France

5 - Université Bourgogne Europe, Centre de Lutte Contre le Cancer G.-F. Leclerc, INSERM, CTM UMR 1231, TIRECS Team (Bioactive Molecules and Health Research Group), 21000 Dijon, France

6 -Université Bourgogne Europe, Centre de Lutte Contre le Cancer G.-F. Leclerc, Institut Agro, CHU Dijon Bourgogne, INSERM, BioSanD US 58, 21000 Dijon, France

# These authors contributed equally of this work

≠ Senior author coshared this work

***To whom all correspondence should be addressed:**

Pr. Dominique Delmas

Centre de Recherche Inserm U1231 "Center for Translational and Molecular Medicine"

Faculté des Sciences de Santé

7, Bd Jeanne d’Arc, 21000 Dijon, France

Phone number: +33-380-39-32-26

Email: [dominique.delmas@u-bourgogne.fr](mailto:dominique.delmas@u-bourgogne.fr)

**Supplementary tables S1-S7**

**Supplementary Table S1. Aplidin® Inhibitory Concentration 50% (IC50) values determined from cell viability assays on HeLa WT and APLR cell lines.**

| Cell line | IC50 (nM) | | |
| --- | --- | --- | --- |
| 24h | 48h | 72h |
| WT | 121.43 ± 11.94 | 5.92 ± 1.08 | 1.57 ± 0.16 |
| APLR | > 10000 | > 10000 | 4921.58 ± 335.23 |

**Supplementary Table S2. Ratio of cytosol/mitochondria fractions after 24h of APL treatment on the Hela WT and APLR cancer cells.**

|  | | BAX | Smac/Diablo | Cytochrome C |
| --- | --- | --- | --- | --- |
| WT | Co | 3.91 | 0.17 | 0.17 |
| APL | 0.59 | 0.38 | 0.38 |
| APLR | Co | 1.89 | 0.28 | 0.28 |
| APL | 1.33 | 0.47 | 0.47 |

**Supplementary Table S3. Human primers used for RT-qPCR or qPCR analysis.**

| **Gene** | **Forward sequence** | **Reverse sequence** | **Application** |
| --- | --- | --- | --- |
| *CDS2* | 5’-CAGTCAGTCATTGGCTGGAA-3’ | 5’-GCGAAGAATCCTCCAAAGG-3’ | RT-qPCR |
| *PGS1* | 5’-CTACCTGGGGACAGGTCCTT-3’ | 5’-TTGCTTGGAGTGACTTTTCTAGAGT-3’ |
| *PTPMT1* | 5’-GGTGGCAGCATACCTGATTC-3’ | 5’-ATCTTGGCGATGGCTCTTAC-3’ |
| *CRLS1* | 5’-CGAACTCTTCCAACACCACG-3’ | 5’-GACTGCTGTATTCACCTTGCTG-3’ |
| *PNPLA8* | 5’-ACAAGCCTACAAGTCCTTCTGCGA-3’ | 5’-AAAGCTTGTACACCTTCCGTGGGA-3’ |
| *PLA2G6* | 5’-ACTGCCACACTCAGATGGATGTCA-3’ | 5’-ACCTGAGAATTGTCACCCTGGACA-3’ |
| *TAZ* | 5’-CTCCCACTTCTTCAGCTTGG-3’ | 5’-TCTGGTAGACGCCATCTCCT-3’ |
| *ACTB* | 5’-AGAGCTACGAGCTGCCTGAC-3’ | 5’-AGCACTGTGTTGGCGTACAG-3’ |
| mtMinArc | 5’-CTAAATAGCCCACACGTTCCC-3’ | 5’-AGAGCTCCCGTGAGTGGTTA-3’ | qPCR |
| mtMajArc | 5’-CTGTTCCCCAACCTTTTCCT-3’ | 5’-CCATGATTGTGAGGGGTAGG-3’ |
| *B2M* | 5’-GCTGGGTAGCTCTAAACAATGTATTCA-3’ | 5’-CCATGTACTAACAAATGTCTAAAATGGT-3’ |

**Supplementary Table S4. Antibodies.** WB. Western blotting; IF. Immunofluorescence.

| **Antibody** | **Provider** | **Reference** | **Isotype** | **Dilution** | **Application** |
| --- | --- | --- | --- | --- | --- |
| PTPMT1 | Proteintech | 11493-1-AP | Rabbit | 1:400 | WB |
| CRLS1 | Thermo Fisher Scientific | PA5-25338 | Rabbit | 1:1000 |
| TAZ | Abcam | ab93362 | Rabbit | 1:500 |
| LYCAT | Thermo Fisher Scientific | PA5-28498 | Rabbit | 1:500 |
| PLA2G6 | Sigma-Aldrich | HPA001171 | Rabbit | 1:1000 |
| COX IV | Cell Signaling Technology | #4850 | Rabbit | 1:1000 |
| Tom20 | Cell Signaling Technology | #42406 | Rabbit | 1:1000 |
| Caspase 8 | Cell Signaling Technology | #4790 | Rabbit | 1:1000 |
| Bid | Cell Signaling Technology | #2002 | Rabbit | 1:1000 |
| Bax | Cell Signaling Technology | #2772 | Rabbit | 1:1000 |
| Bak | Millipore | #ABC12 | Rabbit | 1:1000 |
| Bcl-2 | Cell Signaling Technology | #4223 | Rabbit | 1:1000 |
| Bcl-xL | Cell Signaling Technology | #2764 | Rabbit | 1:1000 |
| Mcl-1 | Cell Signaling Technology | #4572 | Rabbit | 1:1000 |
| Cytochrome c | Cell Signaling Technology | #11940 | Rabbit | 1:1000 |
| Smac/Diablo | Cell Signaling Technology | #15108 | Rabbit | 1:1000 |
| Caspase 9 | Cell Signaling Technology | #9508 | Mouse | 1:1000 |
| Caspase 3 | Cell Signaling Technology | #9662 | Rabbit | 1:1000 |
| PARP | Cell Signaling Technology | #9542 | Rabbit | 1:1000 |
| OXPHOS | Thermo Fisher Scientific | #45-8099 | Mouse | 1:1000 |
| α-tubulin | Santa Cruz Biotechnology | sc-5286 | Mouse | 1:1000 |
| HSC-70 | Santa Cruz Biotechnology | sc-7298 | Mouse | 1:1000 |
| β-actin | Sigma-Aldrich | A1978 | Mouse | 1:2000 |
| P-ULK1 (Ser757) | Cell Signaling Technology | #14202 | Rabbit | 1:1000 |
| ULK1 | Cell Signaling Technology | #8054 | Rabbit | 1:1000 |
| p62 | Cell Signaling Technology | #8025 | Rabbit | 1:1000 |
| LC3A/B | Cell Signaling Technology | #12741 | Rabbit | 1:1000 |
| Bax (N-20) | Santa Cruz Biotechnology | Sc-493 | Rabbit | 1:200 | IF |
| COX IV | Cell Signaling Technology | #11967 | Mouse | 1:200 | IF |
| Ki67 | BD Biosciences | #550609 | Mouse | 1:200 | Cytometry |

**Supplementary Table S5. Internal standards used for lipidomic analyses by HPLC-MS/MS.**

| **Lipid species** | **Standard** | **Provider** | **Reference** | **Quantity** |
| --- | --- | --- | --- | --- |
| CL | (14:0)4 CL | Avanti Polar Lipids | 710332 | 2 μg |
| PC | (12:0)2 PC | Avanti Polar Lipids | 850335 | 2 μg |
| LPC | 14:0 Lyso PC | Avanti Polar Lipids | 855575 | 0.5 μg |
| PE | (14:0)2 PE | Avanti Polar Lipids | 850745 | 1 μg |
| LPE | 14:0 Lyso PE | Avanti Polar Lipids | 856735 | 0.25 μg |

**Supplementary Table S6. Potential combinations of fatty acids corresponding to the different CL species in HeLa WT and APLR cells and tumors after APL treatment with significative variations (related to in Fig. 2 and Fig. 7).**

| **m/z** | **CL species** | **Potential combinations of fatty acids** |
| --- | --- | --- |
| 925.6 | 36:3 DLCL | (18:1)(0:0)/(18:2)(0:0) |
| 1187.78 | 54:5 MLCL | (36:4)(18:1) or (36:3)/(18:2) or (34:1)/(20:4) |
| 1185.78 | 54:6 MLCL | (36:5)(18:1) or (36:4)(18:2) or (34:2)(20:4) |
| 1347.9 | 64:2 CL | (16:0)(16:0)/(16:1)(16:1) |
| 1345.9 | 64:3 CL | (18:1)(16:1)/(14:0)(16:1) or (16:1)(16:1)/(16:1)(16:0) |
| 1344.8 | 64:4 CL | (16:1)(16:1)/(16:1)(16:1) |
| 1377.8 | 66:1 CL | (16:0)(18:0)/(16:1)(16:0) |
| 1375.9 | 66:2 CL | (16:0)(18:1)/(16:0)(16:1) |
| 1371.9 | 66:4 CL | (18:1)(16:1)/(16:1)(16:1) |
| 1403.8 | 68:2 CL | (18:1)(18:0)/(16:0)(16:1) or (16:0)(18:1)/(16:0)(18:1) |
| 1402.0 | 68:3 CL | (16:1)(18:1)/(18:1)(16:0) |
| 1399.9 | 68:4 CL | (16:1)(18:1)/(16:1)(18:1) |
| 1397.8 | 68:5 CL | (16:1)(18:2)/(18:1)(16:1) |
| 1396 | 68:6 CL | (16:1/16:1)/(18:2/18:2); (16:0/16:1)/(18:2/18:3); (14:0/18:2)/(18:2/18:2) |
| 1432.3 | 70:2 CL | (18:1)(18:0)/(18:1)(16:0) or (18:0)(18:0)/(18:1)(16:1) |
| 1429.8 | 70:3 CL | (18:1)(18:1)/(16:0)(18:1) or (18:0)(18:1)/(18:1)(16:1) |
| 1424.6 | 70:6 CL | (16:1)(18:2)/(18:1)(18:2) |
| 1422 | 70:7 CL | (16:1/18:2)/( 18:2/18:2); (16:0/16:1)/(18:2/20:4); (16:1/16:1)/(18:1/20:4) |
| 1457.8 | 72:3 CL | (18:1)(18:1)/(18:1)(18:0) |
| 1455.8 | 72:4 CL | (18:1)(18:1)/(18:1)(18:1) |
| 1453.8 | 72:5 CL | (18:1)(18:2)/(18:1)(18:1) |
| 1451.8 | 72:6 CL | (18:1)(18:2)/(18:1)(18:2) |
| 1450 | 72:7 CL | (16:0/18:1)/(18:2/20:4); (16:0/18:1)/(18:2/20:4); (16:0/18:1)/(18:2/20:4); (18:1/18:2)/(18:2/18:2) |
| 1448 | 72:8 CL | (16:0/16:0)/(20:4/20:4); (16:0/18:2)/(18:2/20:4); (16:0/16:0)/(20:4/20:4); (18:2/18:2)/(18:2/18:2) |
| 1446 | 72:9 CL | (18:2/18:2)/(18:2/18:3); (18:2/20:4)/(16:1/18:2) |
| 1478 | 74:7 CL | (18:0/18:1)/(18:2/20:4); (18:0/18:1)(18:2/20:4); (18:1/18:1)/(18:1/20:4) |
| 1474 | 74:9 CL | (16:0/18:1)/(20:4/20:4); (18:1/18:2)/(18:2/20:4) |
| 1472 | 74:10 CL | (16:0/18:2)/(20:4/20:4); (18:2/18:2)/(18:2/20:4) |
| 1498 | 76:11 CL | (18:1/18:2)(20:4/20:4) |
| 1496 | 76:12 CL | (16:0/20:4)(20:4/20:4); (18:2/18:2)(20:4/20:4) |

**Supplementary Table S7. Potential fatty-acid combinations corresponding to phospholipid (PL) molecular species exhibiting significant variations in HeLa WT and APLR cells following a 24-h treatment with 450 nM APL (related to Fig. 4C).**

| **m/z** | **PL species** | **Potential combinations of fatty acids** |
| --- | --- | --- |
| 662.5 | 30:1 PE | (12:0/18:1); (14:0/16:1) |
| 690.5 | 32:1 PE | (14:0/18:1); (16:0/16:1) |
| 688.5 | 32:2 PE | (14:0/18:2); (16:1/16:1) |
| 716.5 | 34:2 PE | (16:0/18:2); (16:1/18:1) |
| 714.5 | 34:3 PE | (16:1/18:2); (16:0/18:3) |
| 712.5 | 34:4 PE | (14:0/20:4); (16:0/18:4); (16:1/18:3) |
| 748.6 | 36:0 PE | (18:0/18:0); (16:0/20:0) |
| 746.6 | 36:1 PE | (18:0/18:1) |
| 744.5 | 36:2 PE | (18:0/18:2); (18:1/18:1) |
| 740.5 | 36:4 PE | (16:0/20:4); (18:2/18:2) |
| 738.5 | 36:5 PE | (16:1/20:4); (18:1/18:4) |
| 774.5 | 38:1 PE | (18:0/20:1); (20:0/18:1) |
| 772.6 | 38:2 PE | (18:1/20:1); (18:0/20:2) |
| 770.6 | 38:3 PE | (18:1/20:2); (18:0/20:3); (20:1/18:2) |
| 768.5 | 38:4 PE | (18:0/20:4) |
| 766.5 | 38:5 PE | (18:1/20:4); (18:0/20:5) |
| 764.5 | 38:6 PE | (16:0/22:6); (18:2/20:4) |
| 802.6 | 40:1 PE | (18:0/22:1); (20:0/20:1) |
| 800.6 | 40:2 PE | (18:0/22:2); (20:0/20:2); (22:0/18:2) |
| 798.6 | 40:3 PE | (20:0/20:3); (20:1/20:2); (22:0/18:3) |
| 796.6 | 40:4 PE | (18:0/22:4); (20:0/20:4); (20:2/20:2) |
| **Supplementary Table S7. Continued.** | | |
| **m/z** | **PL species** | **Potential combinations of fatty acids** |
| 794.6 | 40:5 PE | (20:1/20:4); (18:1/22:4); (20:0/20:5) |
| 792.5 | 40:6 PE | (18:0/22:6); (20:1/20:5); (20:2/20:4 ) |
| 790.5 | 40:7 PE | (18:1/22:6); (18:3/22:4); (20:2_20:5); (20:3/20:4) |
| 788.5 | 40:8 PE | (18:2/22:6); (18:4/22:4); (20:3/20:5); (20:4/20:4) |
| 830.7 | 42:1 PE | (20:0/22:1 ); (18:0/24:1) |
| 828.6 | 42:2 PE | (22:0/20:2); (20:0/22:2); (20:1/22:1) |
| 826.6 | 42:3 PE | (20:1/22:2); (22:0/20:3) |
| 824.6 | 42:4 PE | (20:2/22:2); (22:0/20:4) |
| 822.6 | 42:5 PE | (22:0/20:5); (22:1/20:4) |
| 858.7 | 44:1 PE | (22:0/ 20:1); (24:0/20:1); (20:0/24:1) |
| 856.7 | 44:2_PE | (22:0/22:2) |
| 854.7 | 44:3_PE | (22:1/22:2) |
| 852.6 | 44:4_PE | (22:0/22:4); (22:2/22:2) |
| 850.6 | 44:5_PE | (22:1/22:4) |
| 848.6 | 44:6_PE | (22:0/22:6); (22:2/22:4) |
| 678.6 | 28:0 PC | (14:0/14:0) |
| 702.6 | 30:2 PC | (12:0/18:2); (14:1/16:1) |
| 730.6 | 32:2 PC | (14:0/18:2); (16:1/16:1) |
| 744.6 | 33:2 PC | (16:0/17:1); (15:0/18:1) |
| 754.6 | 34:4 PC | (14:0/20:4); (16:1/18:3); (16:0/18:4); (16:2/18:2) |
| 756.6 | 34:3 PC | (16:0/18:3); (16:1/18:2); (14:0/20:3) |
| 762.6 | 34:0 PC | (16:0/18:0) |
| 780.6 | 36:5 PC | (14:0/22:5); (16:0/20:5); (16:1/20:4) |
| 782.6 | 36:4 PC | (14:0/22:4); (16:0/20:4); (16:1/20:3); (18:0/18:4) |
| 788.6 | 36:1 PC | (18:0/18:1); (14:0/22:1); (16:0/20:1); (20:0/16:1); (14:0/22:1) |
| 804.6 | 38:7 PC | (16:1/22:6); (18:2/20:5); (18:3/20:4); (20:3/18:4) |
| 806.6 | 38:6 PC | (16:0/22:6); (16:1/22:5); (18:1/20:5); (18:2/20:4); (18:3/20:3); (20:2/18:4) |
| 808.6 | 38:5 PC | (16:0/22:5); (16:1/22:4); (18:0/20:5); (18:1/20:4); (20:1/18:4); (20:2/18:3) |
| 810.6 | 38:4 PC | (16:0/22:4); (18:0/20:4) |
| 830.6 | 40:8 PC | (20:4/20:4); (18:4/22:4); (20:3/20:5) |
| 832.6 | 40:7 PC | (18:1/22:6); (18:2/22:5); (18:3/22:4) |
| 834.6 | 40:6 PC | (18:0/22:6); (18:1/22:5); (18:2/22:4); (20:1/20:5); (20:2/20:4); (20:3/20:3) |
| 836.6 | 40:5 PC | (18:0/22:5); (18:1/22:4); (20:0/20:5); (20:1/20:4); (22:1/18:4); (20:2/20:3) |
| 838.6 | 40:4 PC | (18:0/22:4); (18:2/22:2); (20:0/20:4); (20:1/20:3); (20:2/20:2) |
| 760.7 | 34:1 pPC | (p16:0/18:1) |
| 742.7 | 34:2 pPC | (p16:0/18:2) |
| 762.6 | 34:0 pPC | (p16:0/18:0) |
| 766.6 | 36:4 pPC | (p16:0/20:4); (p18:0/18:4) |
| 768.6 | 36:3 pPC | (p16:0/20:3); (p18:0/18:3) |
| 770.6 | 36:2 pPC | (p16:0/20:2); (p18:0/18:2) |
| 774.6 | 36:0 pPC | (p16:0/20:0); (p18:0/18:0) |
